# Supplementary material
Source: PubMed Central journal article supplement (PMC10425838)
Supplement: EMBJ-42-e111133-s001.pdf [file EMBJ-42-e111133-s001.pdf]

## Appendix to:

# Cellular senescence leads to progressive cell death via the INK4a-RB pathway in naked mole-rats

Yoshimi Kawamura, Kaori Oka, Takashi Semba, Mayuko Takamori, Yuki Sugiura, Riyo Yamasaki, Yusuke Suzuki, Takeshi Chujo, Mari Nagase, Yuki Oiwa, Shusuke Fujioka, Sayuri Homma, Yuki Yamamura, Shingo Miyawaki, Minoru Narita, Takaichi Fukuda, Yusuke Sakai, Takatsugu Ishimoto, Kazuhito Tomizawa, Makoto Suematsu, Takuya Yamamoto, Hidemasa Bono, Hideyuki Okano and Kyoko Miura

## Table of contents

|                         |    |
|-------------------------|----|
| Appendix Figure S1..... | 2  |
| Appendix Figure S2..... | 3  |
| Appendix Figure S3..... | 4  |
| Appendix Figure S4..... | 5  |
| Appendix Figure S5..... | 6  |
| Appendix Figure S6..... | 7  |
| Appendix Figure S7..... | 8  |
| Appendix Figure S8..... | 9  |
| Appendix Table S1.....  | 10 |
| Appendix Table S2.....  | 11 |

# Appendix Figure S1

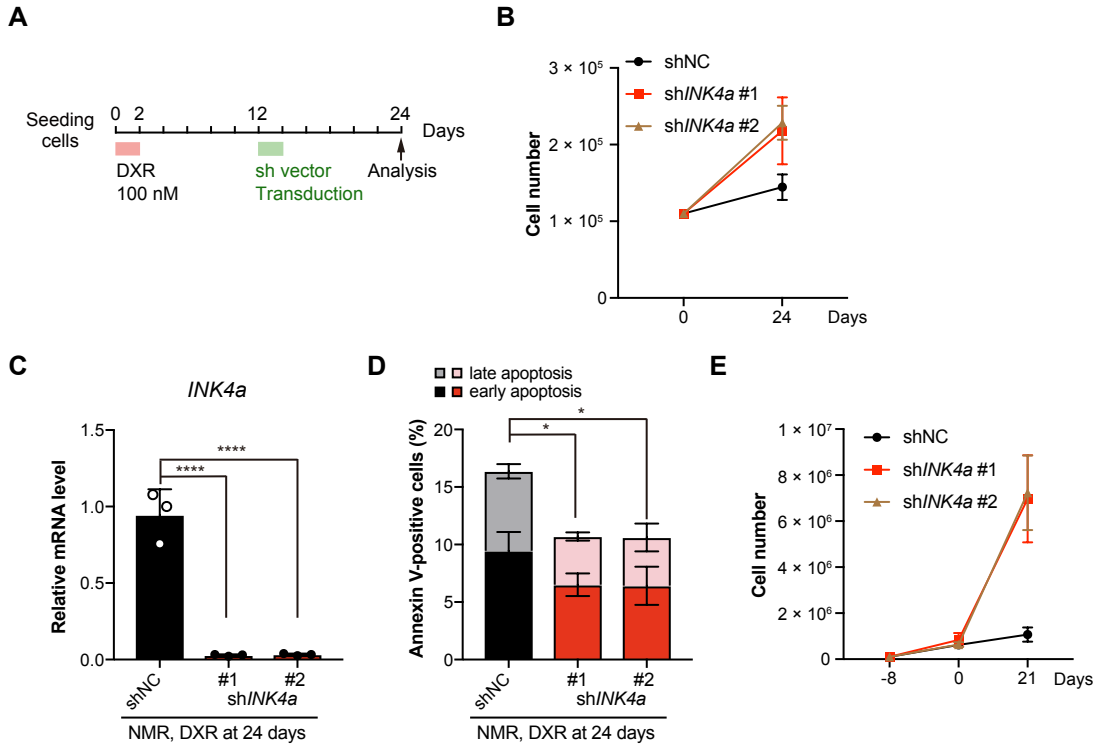

**Appendix Figure S1. Induction of cellular senescence by DNA damage leads to delayed, progressive cell death in an *INK4a*-dependent manner in NMR fibroblasts.**

(A) Scheme for doxorubicin (DXR) treatment before *INK4a* knockdown.

(B) Proliferation of NMR fibroblasts treated with DXR before *INK4a* knockdown.

(C, D) qRT-PCR analysis of the expression of *INK4a* normalized to *ACTB* mRNA levels (C) and quantification of Annexin V-positive cells (%) (Annexin V+/PI- as early apoptotic and Annexin V+/PI+ double-positive as late apoptotic) (D) in NMR fibroblasts treated with DXR before *INK4a* knockdown.

(E) Proliferation of NMR fibroblasts treated with DXR after *INK4a* knockdown (the same treatment as in Fig 11). The DXR treatment was performed from day 0.

\*  $P < 0.05$ , \*\*\*\*  $P < 0.0001$ ; ns, not significant. One-way ANOVA followed by Dunnett's multiple comparison test for (C and D).

Data are expressed as the mean  $\pm$  SD from  $n = 3$  biological replicates.

# Appendix Figure S2

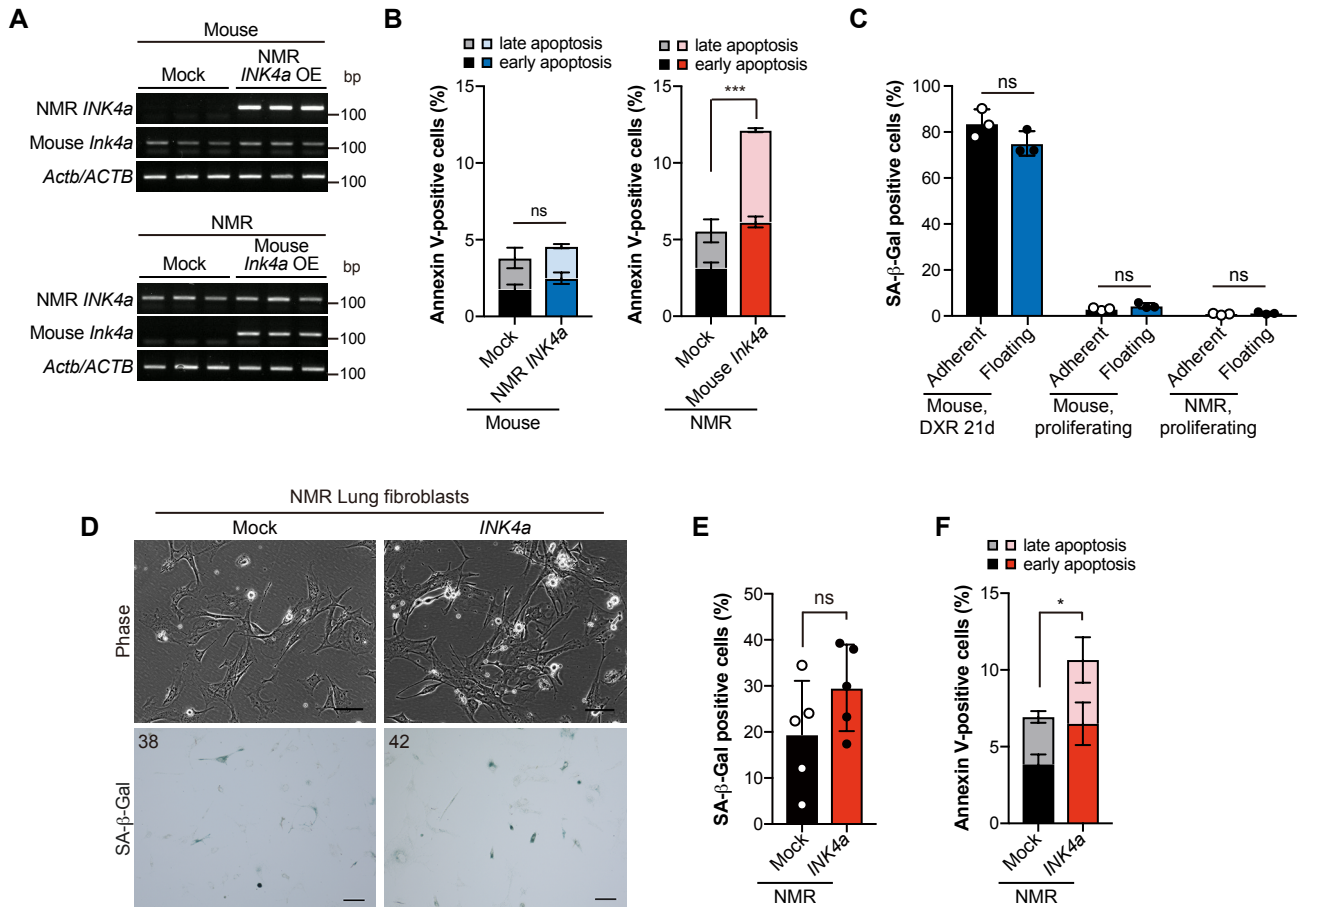

## Appendix Figure S2. *INK4a* transduction results in progressive cell death in NMR skin and lung fibroblasts.

(A) RT-PCR analysis of expression of mouse *Ink4a* and NMR *INK4a* in NMR *INK4a*-transduced mouse fibroblasts or mouse *Ink4a*-transduced NMR fibroblasts at 12 days after transduction. OE; overexpression.

(B) Quantification of Annexin V/PI-positive cells (%) (Annexin V+/PI- as early apoptotic and Annexin V+/PI+ double-positive as late apoptotic) at 12 days after transduction of NMR *INK4a* into mouse fibroblasts or mouse *Ink4a* into NMR fibroblasts. Data are expressed as the mean ± SD from  $n = 3$  biological replicates.

(C) Quantification of SA-β-Gal-positive cells in the adherent living cell population and floating dead cell population at 24 h after UV-C irradiation. Data are expressed as the mean ± SD from  $n = 3$  biological replicates.

(D) Cell morphology and SA-β-Gal activity in NMR-lung fibroblasts at 12 days after *INK4a* transduction. Scale bar, 100 μm. The number in the upper left corner indicates Hoechst-positive nuclei.

(E–F) Quantification of SA-β-Gal-positive cells (%) (E), and quantification of Annexin V-positive cells (Annexin V+/PI- as early apoptotic and Annexin V+/PI+ double-positive as late apoptotic) (F) in NMR lung fibroblasts at 12 days after *INK4a* transduction (%). Data are expressed as the mean ± SD from  $n = 5$  biological replicates.

\*  $P < 0.05$ , \*\*\*  $P < 0.001$ ; ns, not significant; unpaired  $t$ -test for (B, C, E, and F).

# Appendix Figure S3

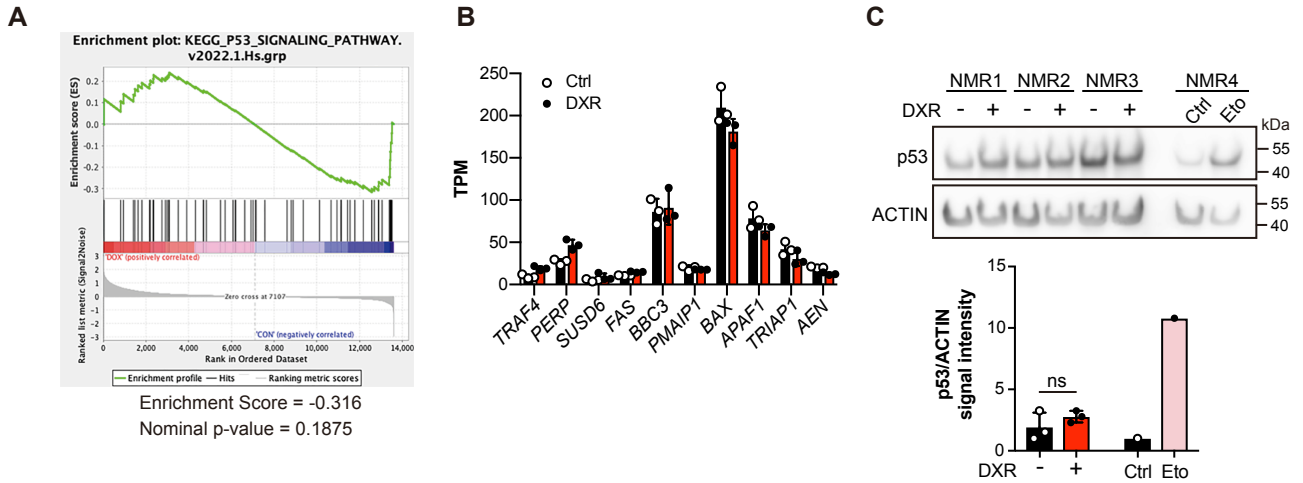

## Appendix Figure S3. Doxorubicin treatment results in progressive cell death independent of p53 in NMR fibroblasts.

(A) Gene set enrichment analysis (GSEA) plot depicting p53 signaling pathway genes in control (Ctrl) versus NMR fibroblasts 21 days after doxorubicin (DXR) treatment.

(B) Expression levels of p53 target genes (transcripts per million, TPM) in Ctrl and NMR fibroblasts 21 days after DXR treatment.

(C) Western blot analysis and quantitative data of p53 in NMR fibroblasts 21 days after DXR treatment or 4 days after 200  $\mu$ M of etoposide (Eto) treatment. ACTIN was used as a loading control. Data are expressed as the mean  $\pm$  SD from  $n = 3$  biological replicates. ns, not significant.

Unpaired *t*-test versus DXR- for C.



# Appendix Figure S4

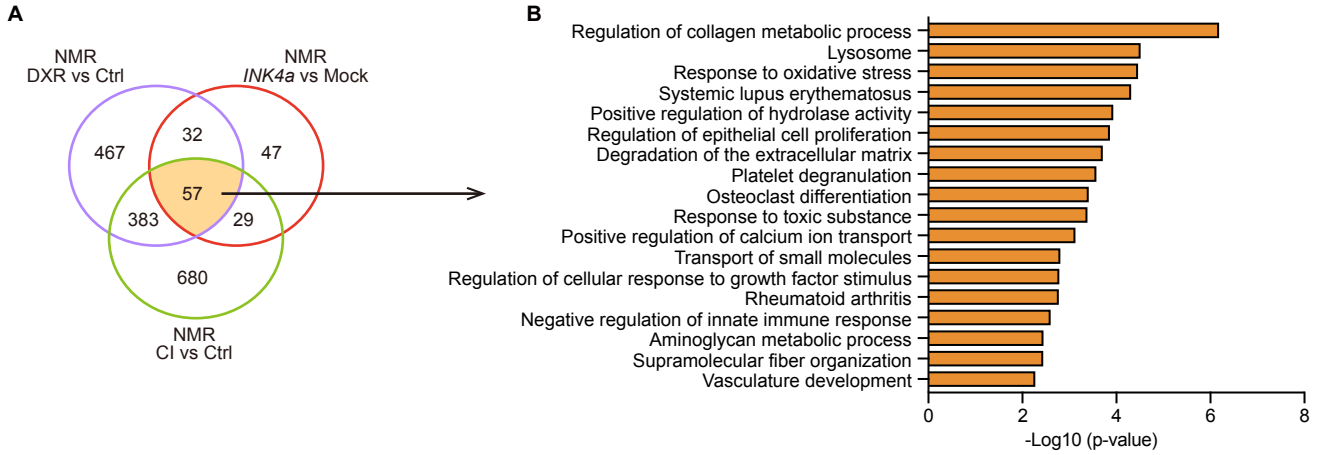

**Appendix Figure S4. Commonly upregulated genes in DXR-treated, *INK4a*-transduced, and CI-induced NMR fibroblasts.**

(A) Venn diagram showing the differentially expressed genes (DEGs, >1.5-fold in DXR-treated, *INK4a*-transduced, or CI-induced NMR fibroblasts) identified from comparisons of Ctrl and DXR-treated NMR fibroblasts at 21 days after treatment, mock and *INK4a*-transduced NMR fibroblasts at 12 days after transduction, or Ctrl and CI-induced NMR fibroblasts at 28 days after induction. Data were obtained from  $n = 3$  biological replicates.

(B) Top 18 enriched gene ontology (GO) terms and KEGG pathways obtained using Metascape analysis of the 57 common genes in A.

# Appendix Figure S5

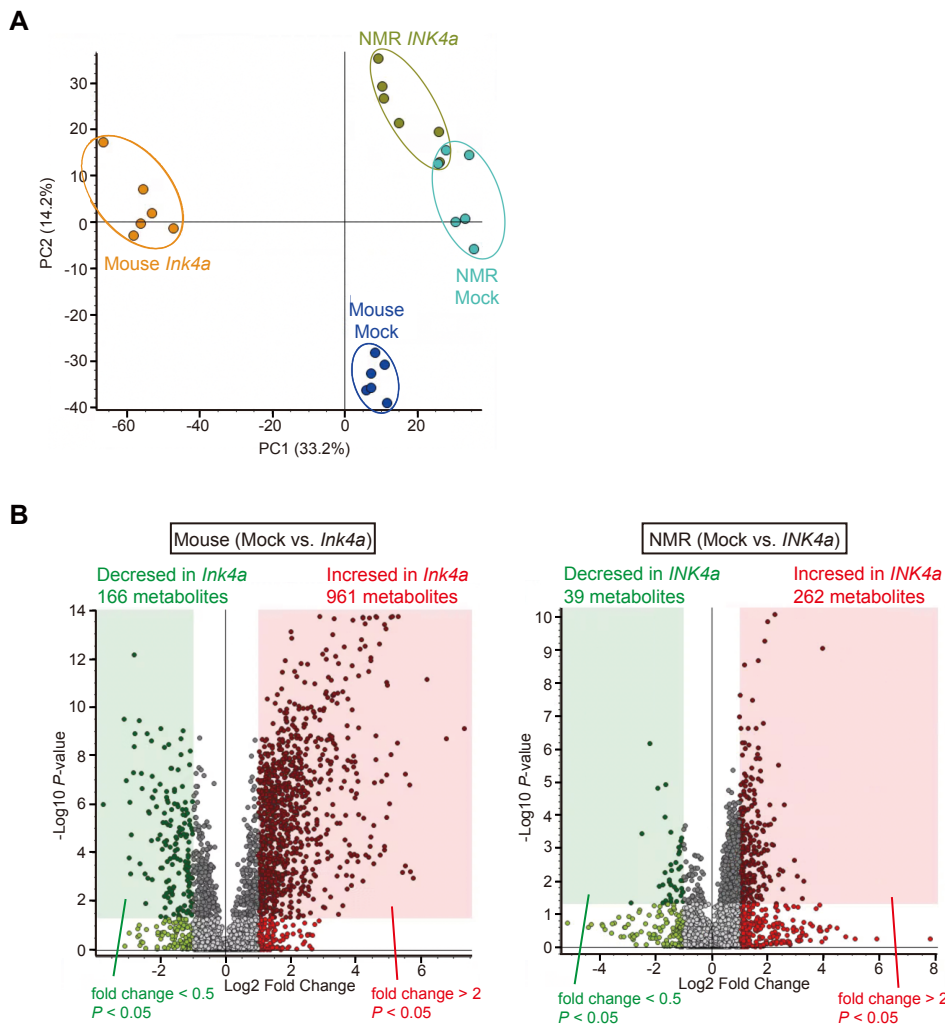

## Appendix Figure S5. Metabolome analysis in *INK4a*-transduced mouse or NMR fibroblasts.

(A) PCA plot of metabolome differences in mouse or NMR fibroblasts at 12 days after *Ink4a/INK4a* or mock vector transduction. Data were obtained from two technical replicates for each primary fibroblast culture ( $n = 3$  biological replicates).

(B) Volcano plots of metabolome differences in mouse or NMR fibroblasts at 12 days after *Ink4a/INK4a* transduction compared with mock. The x-axis shows the fold change in metabolite levels between different samples, and the y-axis shows the statistical significance of the differences. Significantly increased and decreased metabolites are highlighted in red and green, respectively.

# Appendix Figure S6

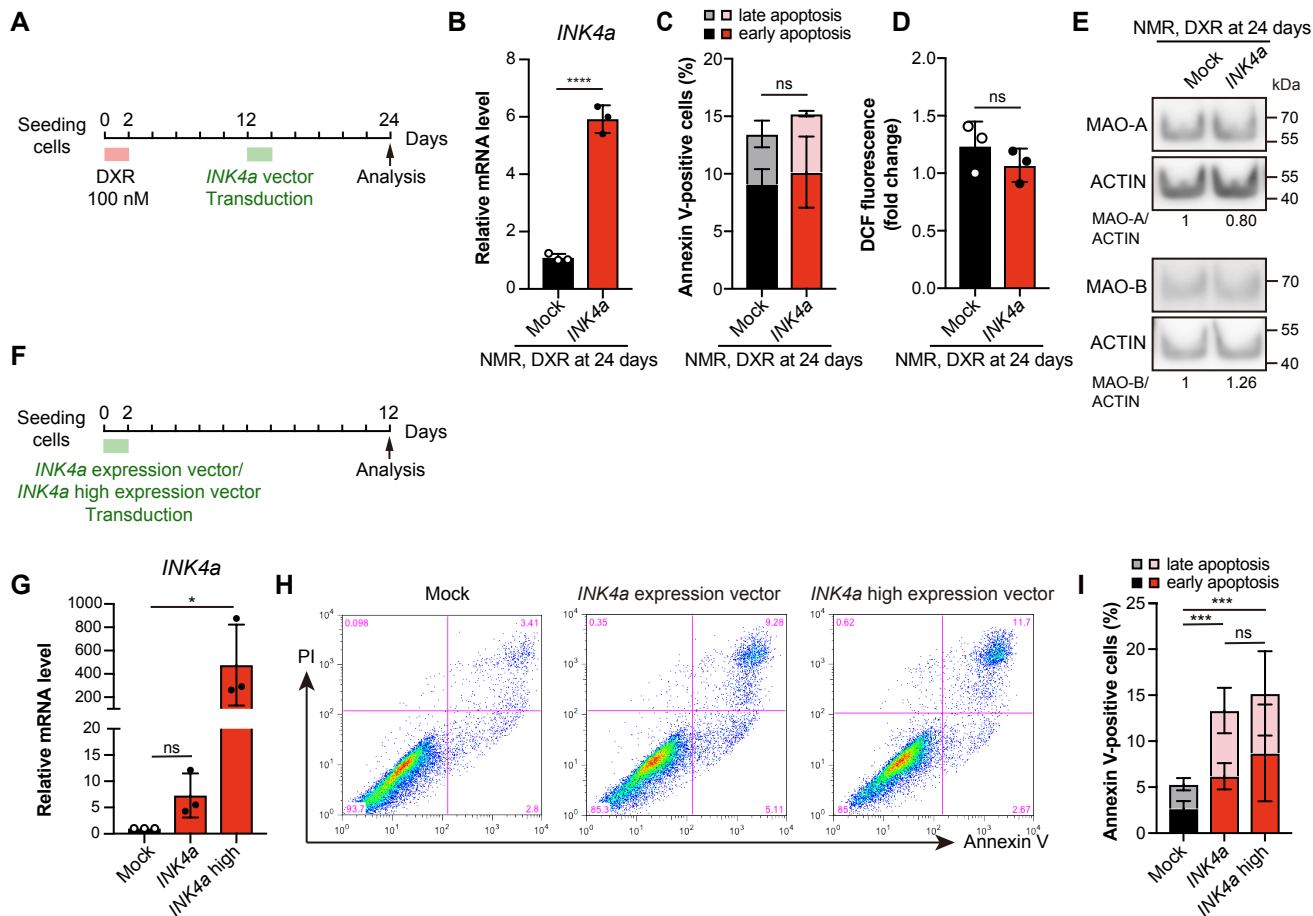

## Appendix Figure S6. Further increasing *INK4a* expression does not further enhance cell death in senescent NMR-fibroblasts.

(A) Scheme for *INK4a* overexpression after doxorubicin (DXR) treatment in NMR fibroblasts.

(B–D) qRT-PCR analysis of the expression of *INK4a* normalized to *ACTB* mRNA levels (B), quantification of Annexin V-positive cells (%) (Annexin V+/PI– as early apoptotic and Annexin V+/PI+ double-positive as late apoptotic) (C), and quantification of reactive oxygen species (ROS) using 2',7'-dihydrodichlorofluorescein diacetate (DCFH-DA) (D) in DXR-treated NMR fibroblasts transduced with *INK4a*.

(E) Western blot analysis of monoamine oxidase (MAO)-A and MAO-B in NMR fibroblasts at 24 days after DXR treatment. ACTIN was used as a loading control. Numbers below the gel images indicate quantification of MAO-A or -B/ACTIN intensity ( $n = 3$  average).

(F) Scheme for *INK4a* overexpression in NMR fibroblasts using vectors with different expression levels.

(G) qRT-PCR analysis of the expression of *INK4a* normalized to *ACTB* mRNA levels at 12 days after *INK4a* transduction.

(H) Representative FACS profiles of Annexin V/PI staining of NMR fibroblasts 12 days after mock or *INK4a* transduction.

(I) Quantification of Annexin V-positive cells (%) (Annexin V+/PI– as early apoptotic and Annexin V+/PI+ double-positive as late apoptotic) at 12 days after *INK4a* transduction.

\*  $P < 0.05$ ; \*\*\*  $P < 0.001$ ; \*\*\*\*  $P < 0.0001$ ; ns, not significant. Unpaired  $t$ -test versus control for (B, C and D). One-way ANOVA followed by Dunnett's multiple comparison test for (G). One-way ANOVA followed by Sidak's multiple comparisons test for (I). Data are expressed as the mean  $\pm$  SD from  $n = 3$  biological replicates.

# Appendix Figure S7

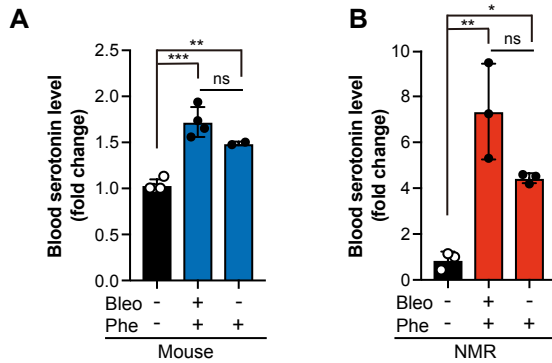

## Appendix Figure S7. Phenelzine administration increases blood serotonin levels.

(A) Blood serotonin levels in mice treated with bleomycin (Bleo) and phenelzine (Phe) or Phe alone. Data are expressed as the mean  $\pm$  SD from  $n = 4$  biological replicates except for Phe only ( $n = 2$ ).

(B) Blood serotonin levels in NMRs treated with Bleo and Phe or Phe alone. Data are expressed as the mean  $\pm$  SD from  $n = 3$  biological replicates.

\*  $P < 0.05$ , \*\*  $P < 0.01$ , \*\*\*  $P < 0.001$ . One-way ANOVA followed by Tukey's multiple comparison test.

# Appendix Figure S8

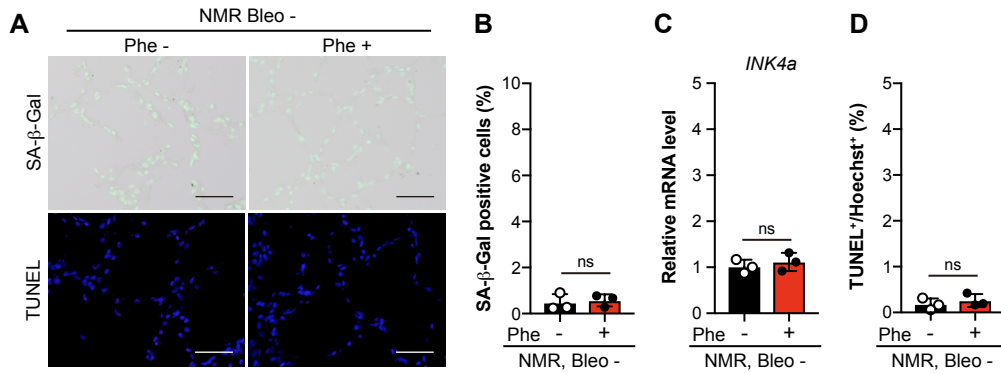

## Appendix Figure S8. Phenelzine administration alone does not affect cell death or cellular senescence in NMR lungs.

(A) SA-β-Gal activity (SA-β-Gal, blue; nuclei, green) and TUNEL staining (TUNEL, red; nuclei, blue) in the lungs of NMRs treated with Phe for 5 consecutive days.

(B–D) Quantification of SA-β-Gal-positive cells (%) (B), qRT-PCR analysis of *INK4a* expression normalized to *ACTB* mRNA levels (C), quantification of TUNEL-positive cells (%) (D) in NMR lungs treated with Phe for 5 consecutive days.

Scale bar, 50 μm. ns, not significant. Unpaired *t*-test versus Phe- for (B–D). Data are expressed as the mean ± SD from *n* = 3 biological replicates.

**Appendix Table S1. Naked mole-rats used in this study.**

| Experiments                             | ID   | Sex       | Birth      | Day of sacrifice or sample collection | Use                                               |
|-----------------------------------------|------|-----------|------------|---------------------------------------|---------------------------------------------------|
| <i>in vitro</i> experiments             | 2B28 | M         | 2018.7.31  | 2019.7.17                             | Skin fibroblasts culture                          |
|                                         | 2E20 | F         | 2017.06.16 | 2018.10.2                             | Skin fibroblasts culture                          |
|                                         | 2E4  | F         | 2016.12.5  | 2020. 6. 13                           | Skin fibroblasts culture                          |
|                                         | 2EX  | M         | 2016-2017  | 2018.6.16                             | Skin fibroblasts culture                          |
|                                         | C42  | M         | 2017.1.5   | 2018.8.16                             | Skin fibroblasts culture, RNA sequencing          |
|                                         | CG3  | M         | 2018.12.14 | 2020.1.29                             | Skin fibroblasts culture                          |
|                                         | CG7  | M         | 2018.12.14 | 2020.1.29                             | Skin fibroblasts culture                          |
|                                         | D2   | ND        | 2009-2010  | 2011.9.21                             | Skin and lung fibroblasts culture, RNA sequencing |
|                                         | D23  | M         | 2016.8.16  | 2017.9.26                             | Skin fibroblasts culture                          |
|                                         | D43  | M         | 2019.12.3  | 2020.12.9                             | Skin fibroblasts culture, RNA sequencing          |
|                                         | G24  | F         | 2014.9.5   | 202015.9.3                            | Skin fibroblasts culture                          |
|                                         | GH30 | F         | 2019.12.11 | 2020.10.29                            | Skin fibroblasts culture, RNA sequencing          |
|                                         | GH32 | F         | 2019.12.11 | 2020.10.30                            | Skin fibroblasts culture                          |
|                                         | GH33 | F         | 2019.12.11 | 2020.10.28                            | Skin fibroblasts culture, RNA sequencing          |
|                                         | H17  | ND        | 2010-2011  | 2012.12.16                            | Skin and lung fibroblasts culture                 |
|                                         | H44  | F         | 2015.8.25  | 2016.12.15                            | Skin fibroblasts culture, RNA sequencing          |
|                                         | H45  | M         | 2015.8.25  | 2016.12.15                            | Skin fibroblasts culture, RNA sequencing          |
|                                         | L14  | F         | 2014.9.8   | 2015.12.10                            | Skin fibroblasts culture, RNA sequencing          |
|                                         | L4   | M         | 2013.12.10 | 2015.3.10                             | Skin fibroblasts culture                          |
|                                         | M15  | F         | 2013.5.13  | 2016.8.1                              | Lung fibroblasts culture                          |
|                                         | O13  | F         | 2012.10.11 | 2016.10.28                            | Lung fibroblasts culture                          |
|                                         | R14  | M         | 2016.8.8   | 2017.7.19                             | Lung fibroblasts culture                          |
| Y26                                     | M    | 2017.3.24 | 2018.8.16  | Skin fibroblasts culture              |                                                   |
| Biopsy                                  | R18  | F         | 2016.8.8   | 2017.9.12                             | RNA extraction                                    |
|                                         | DR9  | M         | 2021.10.15 | 2023.2.9                              | RNA extraction                                    |
|                                         | DR13 | M         | 2021.10.15 | 2023.2.9                              | RNA extraction                                    |
|                                         | D78  | M         | 2021.7.1   | 2023.2.10                             | RNA extraction                                    |
|                                         | F1   | F         | 2002.6.6   | 2017.8.26                             | RNA extraction                                    |
|                                         | H4   | M         | 2008.1.17  | 2023.2.9                              | RNA extraction                                    |
|                                         | H3   | M         | 2008.1.17  | 2023.2.10                             | RNA extraction                                    |
|                                         | G2   | M         | 2008.1.17  | 2023.2.11                             | RNA extraction                                    |
| Bleomycin administration                | LR1  | M         | 2021.6.19  | 2022.8.26                             | Histology and RNA extraction                      |
|                                         | LR2  | M         | 2021.6.19  | 2022.8.26                             | Histology and RNA extraction                      |
|                                         | LR3  | M         | 2021.6.19  | 2022.8.26                             | Histology and RNA extraction                      |
|                                         | D47b | M         | 2021.4.8   | 2022.8.31                             | Histology and RNA extraction                      |
|                                         | D51b | M         | 2021.4.8   | 2022.8.31                             | Histology and RNA extraction                      |
|                                         | Y56b | M         | 2020.6.19  | 2022.8.4                              | Histology and RNA extraction                      |
|                                         | CY10 | M         | 2020.7.8   | 2022.9.7                              | Histology and RNA extraction                      |
|                                         | CY15 | M         | 2020.10.24 | 2022.9.7                              | Histology and RNA extraction                      |
|                                         | CY23 | M         | 2020.10.24 | 2022.9.7                              | Histology and RNA extraction                      |
|                                         | D48b | M         | 2021.4.8   | 2022.9.14                             | Histology and RNA extraction                      |
|                                         | D49b | M         | 2021.4.8   | 2022.9.14                             | Histology and RNA extraction                      |
| D50b                                    | M    | 2021.4.8  | 2022.9.14  | Histology and RNA extraction          |                                                   |
| Bleomycin and phenelzine administration | BC40 | M         | 2021.11.3  | 2023.1.11                             | Histology and RNA extraction                      |
|                                         | BC43 | M         | 2021.11.3  | 2023.1.11                             | Histology and RNA extraction                      |
|                                         | BC44 | M         | 2021.11.3  | 2023.1.11                             | Histology and RNA extraction                      |
| Phenelzine administration               | BC39 | M         | 2021.11.3  | 2023.2.14                             | Histology and RNA extraction                      |
|                                         | BC46 | M         | 2021.11.3  | 2023.2.14                             | Histology and RNA extraction                      |
|                                         | D40b | F         | 2019.10.4  | 2023.2.19                             | Histology and RNA extraction                      |
| Sham control                            | DR2  | M         | 2021.6.23  | 2022.8.31                             | Histology and RNA extraction                      |
|                                         | DCG2 | M         | 2021.5.2   | 2022.8.31                             | Histology and RNA extraction                      |
|                                         | Y57b | M         | 2020.6.19  | 2022.8.4                              | Histology and RNA extraction                      |

**Appendix Table S2. Primers used in this study.**

| Gene                 | Primer  | Sequence (5'-3')          |
|----------------------|---------|---------------------------|
| <i>Ink4a</i> (Mouse) | Forward | GTGTGCATGACGTGCGGG        |
|                      | Reverse | GCAGTTCGAATCTGCACCGTAG    |
| <i>p21</i> (Mouse)   | Forward | TCCCGTGGACAGTGAGCAGTTG    |
|                      | Reverse | CGTCTCCGTGACGAAGTCAAAG    |
| <i>INK4a</i> (NMR)   | Forward | CGCCAATGCCCGGAACCGTTT     |
|                      | Reverse | GCGCCGCGTCATGCACCGGTA     |
| <i>INK4a</i> (NMR)   | Forward | GACCCGAACTGCGCTGACCCT     |
|                      | Reverse | CCGCGTCATGCACCGGTAGTGTGA  |
| <i>p21</i> (NMR)     | Forward | ACCTGTCGCTGTCCTGCACCCTTG  |
|                      | Reverse | CGTCATGCTGGTCTGCCGCCGTT   |
| <i>ACTB</i>          | Forward | AGACCTTCAACACCCCAGCCATGT  |
|                      | Reverse | GGCCAGCCAGGTCCAGACGCAG    |
| <i>SV40LT</i>        | Forward | GCTGACTCTCAACATTCTACTCCTC |
|                      | Reverse | TAGCAGACACTCTATGCCTGTGTGG |
