# Supplementary material
Source: PubMed Central journal article supplement (PMC10425838)
Supplement: EMBJ-42-e111133-s005.pdf [file EMBJ-42-e111133-s005.pdf]

## Expanded View Figures

### Figure EV1. Continuous cultivation after contact inhibition results in progressive cell death in NMR fibroblasts through *INK4a* upregulation.

- A Scheme for continuous cultivation after induction of contact inhibition (CI).
- B, C Cell morphology (B) and SA- $\beta$ -Gal staining (C) in mouse or NMR fibroblasts at 14 or 28 days after induction of CI. Scale bar, 100  $\mu$ m. The number in the upper left corner indicates Hoechst-positive nuclei.
- D, E Quantification of SA- $\beta$ -Gal-positive cells (%) (D), and BrdU-positive cells (%) (E) at 14 or 28 days after induction of CI.
- F qRT-PCR analysis of the expression of *INK4a* in mouse or NMR fibroblasts at 14 or 28 days after induction of CI, normalized to *ACTB* mRNA levels.
- G Quantification of Annexin V-positive (early apoptotic; Annexin V<sup>+</sup>/PI<sup>-</sup> and late apoptotic; Annexin V<sup>+</sup>/PI<sup>+</sup> double-positive) cells (%) at 14 or 28 days after induction of CI.
- H, I qRT-PCR analysis of the expression of *INK4a* normalized to *ACTB* mRNA levels (H), and quantification of Annexin V-positive (early apoptotic; Annexin V<sup>+</sup>/PI<sup>-</sup> and late apoptotic; Annexin V<sup>+</sup>/PI<sup>+</sup> double-positive) cells (%) (I) in sh*INK4a*-transduced NMR-fibroblasts at 21 days after induction of CI.
- J Mouse fibroblasts were passaged 28 days after induction of CI and subjected to cell proliferation analysis.
- K NMR fibroblasts were passaged 28 days after induction of CI and subjected to cell proliferation analysis.

Data information: \* $P < 0.05$ ; \*\* $P < 0.01$ ; \*\*\* $P < 0.001$ ; \*\*\*\* $P < 0.0001$ ; ns, not significant. One-way ANOVA followed by Dunnett's multiple comparison test for (D–I). Data are expressed as the mean  $\pm$  SD from  $n = 3$  biological replicates except for (G) ( $n = 5$ ).

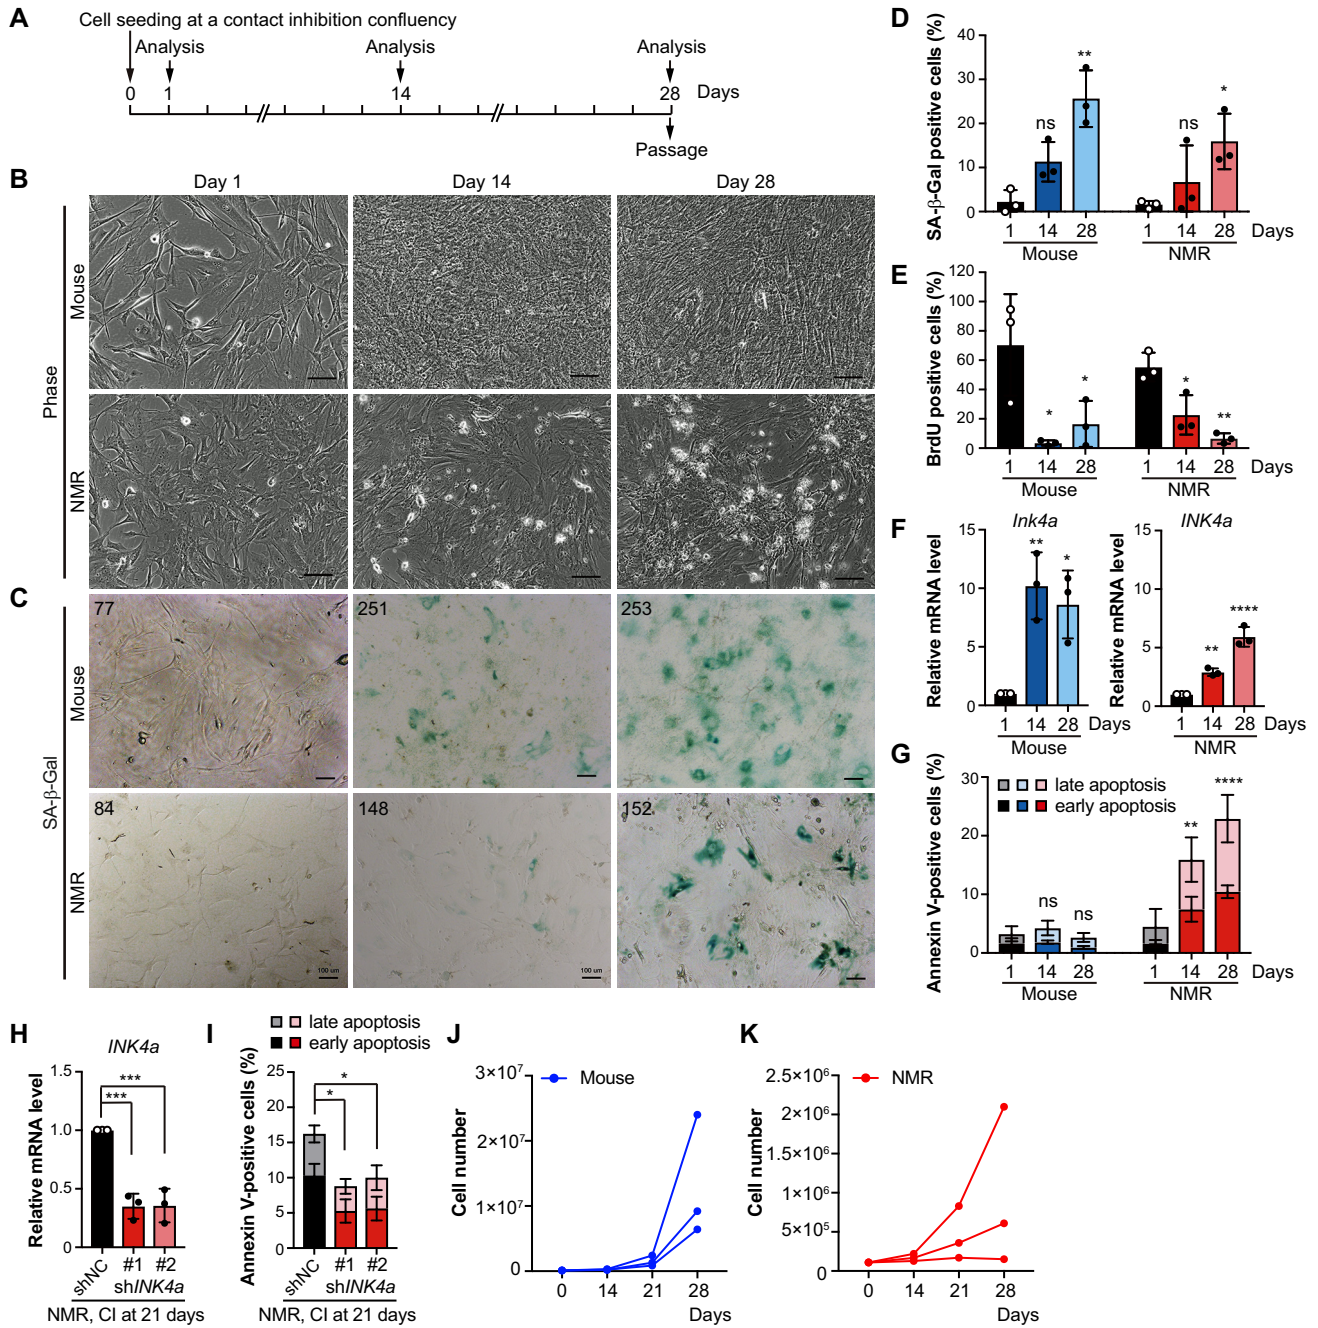

Figure EV1.
